# Supplementary material for: Identification of Two Structural Elements Important for Ribosome-Dependent GTPase Activity of Elongation Factor 4 (EF4/LepA)
Source: PubMed Central journal article supplement (PMC4339808; doi:10.1038/srep08573), 2015-02-25
Supplement: srep08573-s1.pdf [file srep08573-s1.pdf]

**Supplemental Data for:**  
**Identification of Two Structural Elements Important for Ribosome-Dependent  
GTPase Activity of Elongation Factor 4 (EF4/LepA).**

Evelina Ines De Laurentiis<sup>1,2</sup> and Hans-Joachim Wieden<sup>1,3</sup>

<sup>1</sup>Alberta RNA Research and Training Institute, Department of Chemistry and Biochemistry, University of  
Lethbridge, Lethbridge, AB, T1K 3M4, Canada

<sup>2</sup> Current address: Max-Planck Institute for Biophysical Chemistry, Department of Cellular Biochemistry,  
Am Fassberg 11, 37077 Göttingen, Germany

<sup>3</sup> To whom correspondence should be addressed. Tel: 001 403 329 2303; Fax: 001 403 329 2057; Email:  
[hj.wieden@uleth.ca](mailto:hj.wieden@uleth.ca)

## Supplemental Figures

### EF-G

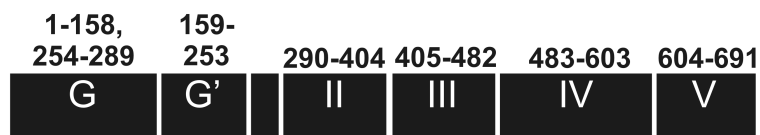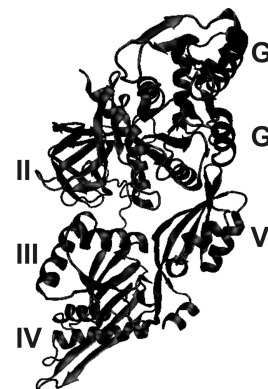

### EF4

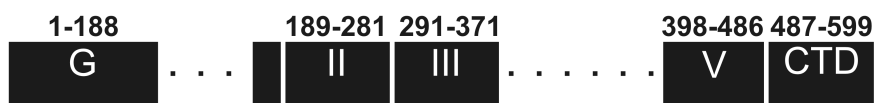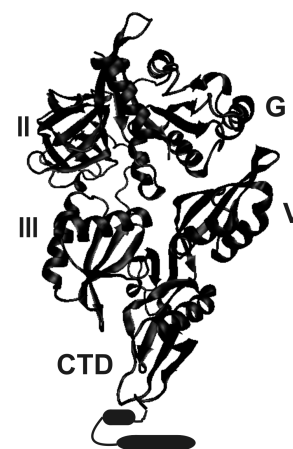

**Figure S1: Structural comparison of EF4 and EF-G.** The domain arrangement is represented on the left, the corresponding residues within the domain are indicated above the respective domain. Cartoon representations of EF-G from *Thermus thermophilus* (PDB ID 1FNM<sup>1</sup>) and EF4 from *Escherichia coli* (PDB ID 3CB4<sup>2</sup>) are shown on the right. Domains are labelled as domain I (G-domain and G'-domain), domain II, domain III, domain IV, domain V and the CTD. The previously unresolved and likely flexible portion of the CTD (residues 556 to 599) is represented as a helix turn helix cartoon based on the recent X-ray crystallographic structure<sup>3</sup>.

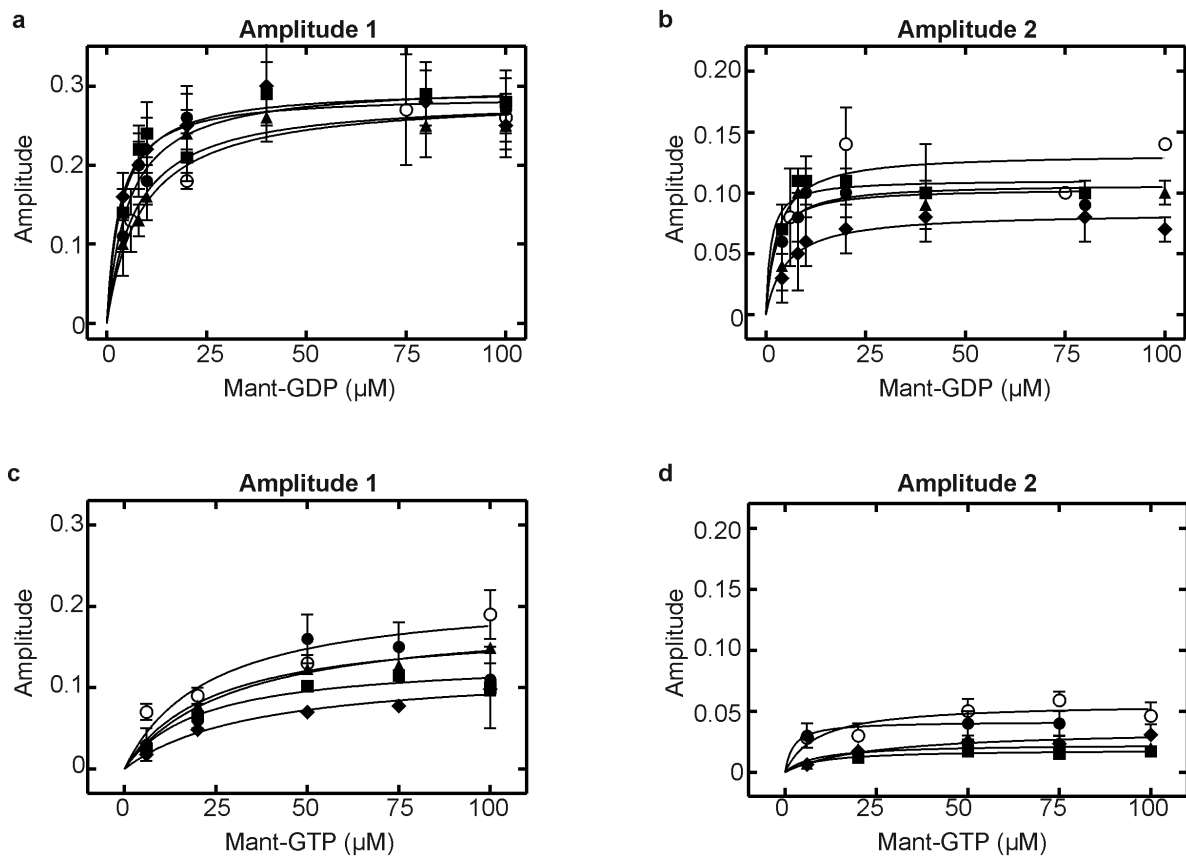

**Figure S2: Amplitude of fluorescence change upon binding of mant-nucleotides to EF4.** EF4 wild type (●), EF4  $\Delta\text{A494}$  (■), EF4  $\Delta\text{P520}$  (▲), EF4  $\Delta\text{G555}$  (◆) and EF4 H81A (○). Concentration dependence of amplitude 1 (a) and amplitude 2 (b) obtained from fluorescence time courses for mant-GTP and amplitude 1 (c) and amplitude 2 (d) obtained for mant-GDP association.

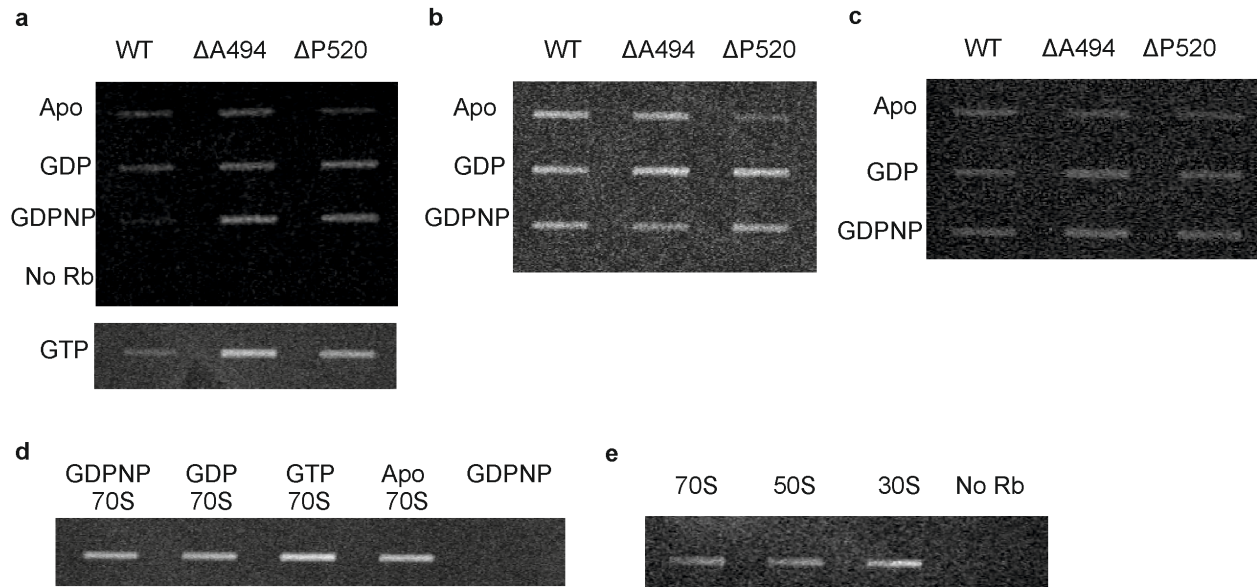

**Figure S3: Immunodetection of EF4 bound to the ribosome following ultracentrifugation.** (a) EF4 proteins (2  $\mu\text{M}$ ) (indicated on top) bound to the 70S (0.1  $\mu\text{M}$ ) ribosome in the presence of various guanine nucleotides (GTP, GDPNP, GDP (0.1 mM)) or *apo* indicated on the left. Pellet following ultracentrifugation of EF4 proteins bound to GDPNP in the absence of ribosome is shown (No Rb). (b) EF4 proteins (2  $\mu\text{M}$ ) bound to the 50S (0.1  $\mu\text{M}$ ) subunit in the presence of various guanine nucleotides (GDPNP, GDP (0.1 mM)) or *apo*. (c) EF4 proteins (2  $\mu\text{M}$ ) bound to the 30S (0.1  $\mu\text{M}$ ) subunit in the presence of various guanine nucleotides (GDPNP, GDP (0.1 mM)) or *apo*. (d) EF4 H81A (2  $\mu\text{M}$ ) bound to the 70S (0.1  $\mu\text{M}$ ) in the presence of various guanine nucleotides (GDPNP, GDP, GTP (0.1 mM)) or *apo* indicated on top. (e) EF4  $\Delta\text{G555}$  protein (10  $\mu\text{M}$ ) bound to the 70S, 50S and 30S (0.1  $\mu\text{M}$ ) in the presence of GDPNP (0.1 mM).

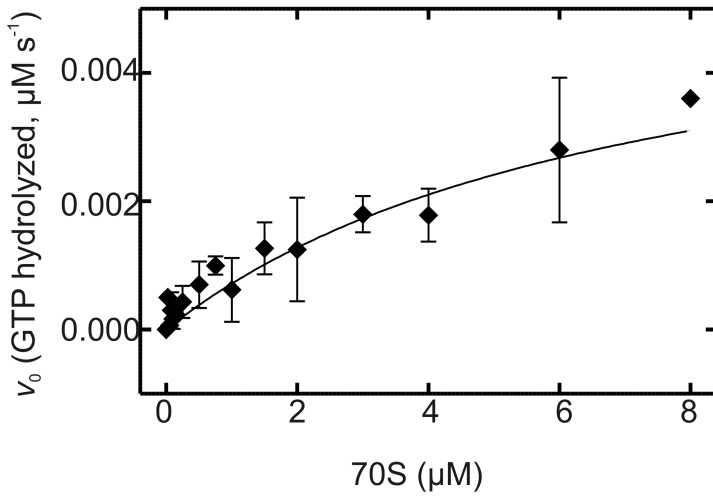

**Figure S4: Michaelis-Menten titration of 70S ribosome stimulated GTPase activity of EF4 ΔG555.**

Initial rates of GTP hydrolysis are plotted as a function of increasing 70S ribosome concentration in the presence of (0.01 μM) EF4 ΔG555.

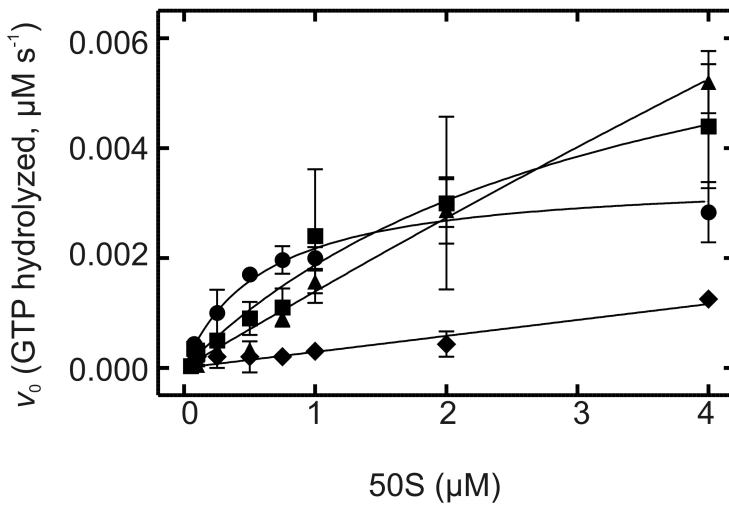

**Figure S5: Michaelis-Menten titration of 50S ribosome subunit stimulated GTPase activity of EF4.**

Initial rates of GTP hydrolysis are plotted as a function of increasing 50S ribosome concentration in the presence of (0.01 μM) EF4 wild type (●), EF4 ΔA494 (■), EF4 ΔP520 (▲), EF4 ΔG555 (◆).

## Supplemental Tables

**Table S1: Summary of dissociation rate constants determined for mant-GDP and mant-GTP from EF4.**

|                                               | EF4           | $\Delta A494$ | $\Delta P520$ | $\Delta G555$ | H81A          |
|-----------------------------------------------|---------------|---------------|---------------|---------------|---------------|
| $k_{off1(GDP)} \text{ y-int (s}^{-1}\text{)}$ | $11 \pm 2$    | $8 \pm 3$     | $13 \pm 1$    | $9 \pm 2$     | $8 \pm 2$     |
| $k_{off1(GTP)} \text{ y-int (s}^{-1}\text{)}$ | $32 \pm 3$    | $39 \pm 3$    | $51 \pm 3$    | $76 \pm 6$    | $46 \pm 6$    |
| $k_{off2(GDP)} \text{ (s}^{-1}\text{)}$       | $8 \pm 2$     | $4 \pm 2$     | $10 \pm 2$    | $3 \pm 2$     | $4 \pm 2$     |
| $k_{off2(GTP)} \text{ (s}^{-1}\text{)}$       | $2.4 \pm 1.5$ | $1.0 \pm 0.5$ | $1.4 \pm 0.6$ | $7.2 \pm 3.8$ | $0.5 \pm 0.4$ |

**Table S2: 50S ribosome dependent GTPase activity of EF4 and three truncation variants.**

| Protein       | $K_M \text{ (}\mu\text{M)}$ | $v_{max} \text{ (}\mu\text{M s}^{-1}\text{)}$ | $k_{cat} \text{ (s}^{-1}\text{)}$ | $k_{cat}/K_M \text{ (s}^{-1}\mu\text{M}^{-1}\text{)}$ |
|---------------|-----------------------------|-----------------------------------------------|-----------------------------------|-------------------------------------------------------|
| EF4           | $0.6 \pm 0.1$               | $0.0035 \pm 0.0003$                           | $0.4 \pm 0.1$                     | $0.7 \pm 0.2$                                         |
| $\Delta A494$ | $3 \pm 2$                   | $0.008 \pm 0.003$                             | $0.8 \pm 0.3$                     | $0.3 \pm 0.2$                                         |
| $\Delta P520$ | $>1$                        | $>0.006$                                      | $>0.6$                            | NA                                                    |
| $\Delta G555$ | $>1$                        | $>0.001$                                      | $>0.1$                            | NA                                                    |

## Sequence Alignment

### Sequences (SwissProt) and Organisms used in the EF4/LepA multiple sequence alignment

| Accession Number | Organism                              | Seq. identity to <i>E. coli</i> (%) |
|------------------|---------------------------------------|-------------------------------------|
| P60785           | <i>Escherichia coli</i>               |                                     |
| Q9X1V8           | <i>Thermotoga maritima</i>            | 50                                  |
| Q72KV2           | <i>Thermus thermophilus</i>           | 55                                  |
| A0RIT7           | <i>Bacillus thuringiensis</i>         | 56                                  |
| C3P8M5           | <i>Bacillus anthracis</i>             | 55                                  |
| P37949           | <i>Bacillus subtilis</i>              | 56                                  |
| Q65H50           | <i>Bacillus licheniformis</i>         | 56                                  |
| A6QHC7           | <i>Staphylococcus aureus</i>          | 54                                  |
| C1CKU6           | <i>Streptococcus pneumoniae</i>       | 54                                  |
| Q5M4M2           | <i>Streptococcus thermophilus</i>     | 56                                  |
| Q831Z0           | <i>Enterococcus faecalis</i>          | 56                                  |
| Q03QU8           | <i>Lactobacillus brevis</i>           | 53                                  |
| Q03FQ4           | <i>Pediococcus pentosaceus</i>        | 53                                  |
| Q14NN1           | <i>Spiroplasma citri</i>              | 53                                  |
| A7FXL9           | <i>Clostridium botulinum</i>          | 55                                  |
| A6L744           | <i>Bacteroides vulgatus</i>           | 53                                  |
| A6LC18           | <i>Parabacteroides distasonis</i>     | 52                                  |
| Q2S5I1           | <i>Salinibacter ruber</i>             | 53                                  |
| A5U598           | <i>Mycobacterium tuberculosis</i>     | 52                                  |
| I7G5I5           | <i>Mycobacterium smegmatis</i>        | 48                                  |
| Q82BZ3           | <i>Streptomyces avermitilis</i>       | 48                                  |
| Q9Z8I4           | <i>Chlamydia pneumoniae</i>           | 50                                  |
| Q823H7           | <i>Chlamydia philipii</i>             | 49                                  |
| Q9PKX6           | <i>Chlamydia muridarum</i>            | 49                                  |
| P60788           | <i>Shigella flexneri</i>              | 100                                 |
| P0A1W5           | <i>Salmonella typhi</i>               | 96                                  |
| A4TKY0           | <i>Yersinia pestis</i>                | 92                                  |
| Q6LMS0           | <i>Photobacterium profundum</i>       | 83                                  |
| Q3IDL4           | <i>Pseudoalteromonas haloplanktis</i> | 75                                  |
| Q0VP16           | <i>Alcanivorax borkumensis</i>        | 74                                  |
| A9KF98           | <i>Coxiella burnetii</i>              | 71                                  |
| Q87C09           | <i>Xylella fastidiosa</i>             | 67                                  |
| A9III9           | <i>Bordetella pertussis</i>           | 66                                  |
| B9J716           | <i>Agrobacterium radiobacter</i>      | 57                                  |
| B9JYH0           | <i>Agrobacterium vitis</i>            | 55                                  |
| Q8UIQ2           | <i>Agrobacterium tumefaciens</i>      | 57                                  |
| Q6G1F5           | <i>Bartonella quintana</i>            | 56                                  |
| Q0C5X0           | <i>Hyphomonas neptunium</i>           | 56                                  |
| Q5NLP5           | <i>Zymomonas mobilis</i>              | 59                                  |
| Q5FHQ1           | <i>Ehrlichia ruminantium</i>          | 51                                  |
| A8F140           | <i>Rickettsia massiliae</i>           | 56                                  |
| C4XND4           | <i>Desulfovibrio magneticus</i>       | 60                                  |

Multiple Sequence Alignment of the C-terminal domain of EF4/LepA. Black indicates 100%, dark grey 80 - 100%, light grey 60 - 80% and white < 60% conservation. The start of the *E. coli* CTD is indicated (red arrow).

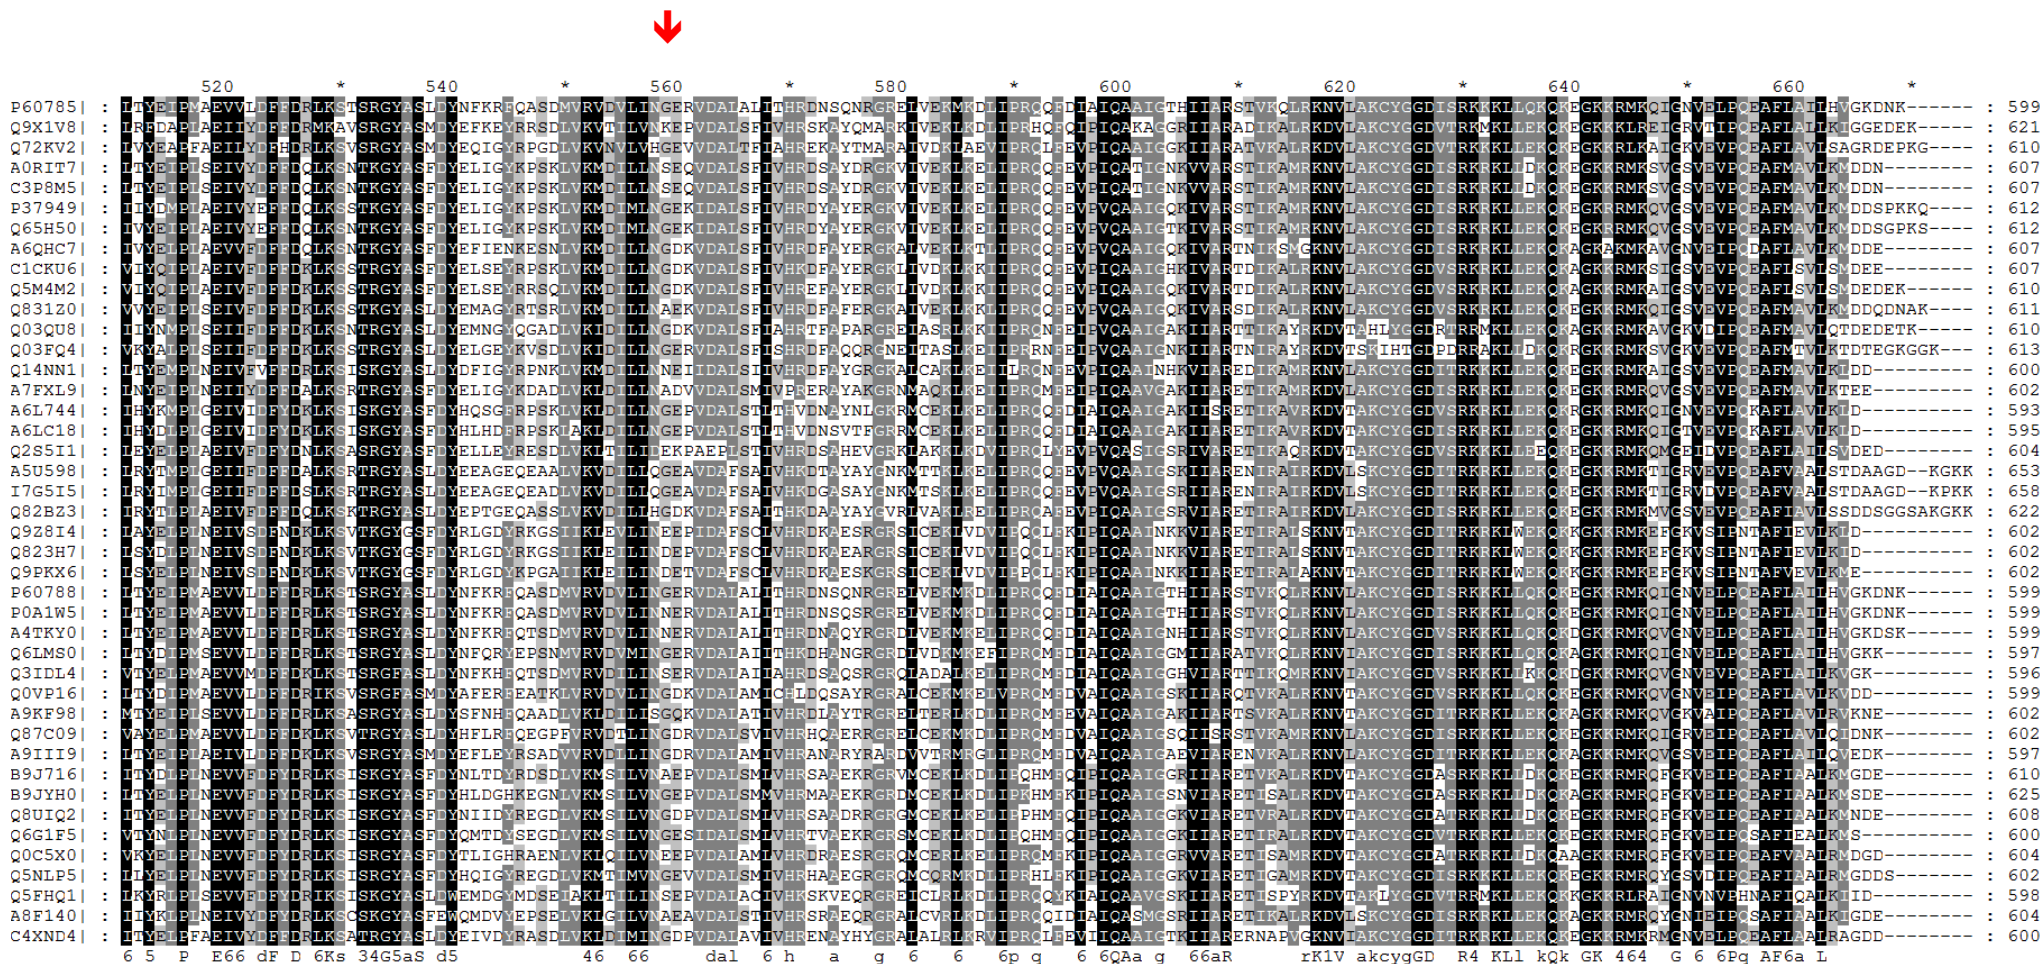



## References

- 1 Laurberg, M. *et al.* Structure of a mutant EF-G reveals domain III and possibly the fusidic acid binding site. *J. Mol. Biol.* **303**, 593-603, doi:10.1006/jmbi.2000.4168 (2000).
- 2 Evans, R. N., Blaha, G., Bailey, S. & Steitz, T. A. The structure of LepA, the ribosomal back translocase. *Proc. Natl. Acad. Sci. USA* **105**, 4673-4678, doi:10.1073/pnas.0801308105 (2008).
- 3 Gagnon, M. G., Lin, J., Bulkley, D. & Steitz, T. A. Crystal structure of elongation factor 4 bound to a clockwise ratcheted ribosome. *Science* **345**, 684-687 (2014).
